# Supplementary material for: Beauty in the eye of the beholder: the two blue opsins of lycaenid butterflies and the opsin gene-driven evolution of sexually dimorphic eyes
Source: Oxford University Press journal article supplement (doi:10.1242/jeb.02360), 2006-08-03
Supplement: jeb02360-sup-tables.pdf [file jeb02360-sup-tables.pdf]

Table S1. Primers used in the present study

| Gene                               | Primer    | Sequence (5' to 3')                                          | $T_m$ | Application |
|------------------------------------|-----------|--------------------------------------------------------------|-------|-------------|
|                                    | 80        | GAA CAR GCW AAR AAR ATG A<br>CCA TCC TAA TAC GAC TCA CTA TAG | 48    | 1, 4        |
| <i>L. rubidus LWRh</i>             | AP1       | GG                                                           | 57    | 1, 2, 3, 4  |
|                                    | LyLWRD1   | GCG AAG ATT GAA CCC CAG ATG                                  | 57    | 3           |
|                                    | LyLWFD2   | TGC ATT AAT GAC CAT CTC CCT CTG                              | 58    | 4           |
| <i>L. rubidus BRh1</i>             | LyLWRD2   | ACA ATT CGC CGT TTT CGT AT                                   | 54    | 4           |
|                                    | LyBRD2    | GAA GGC TCC AGT CAT CGT CAC                                  | 59    | 3           |
|                                    | LyBFD1    | AGA TAC AGG GCG GAA CTT GAG AA                               | 59    | 4           |
| <i>L. rubidus BRh2</i>             | LYBRD1    | GGC GAA AGC TTG GTC CTC TAT                                  | 58    | 4           |
|                                    | LyNBRD1   | TGA AGA GGA AGA AGA TCG TGA AGG                              | 55    | 3, 4        |
| <i>L. rubidus UVRh</i>             | LyNBFD1   | GCC TTC ACG ATC TTC TTC CTC TTC                              | 59    | 4           |
|                                    | LyUVRD1   | TGC AAG CAT TTC TAC ATC TAC ATT                              | 55    | 3           |
|                                    | LyUVFD1   | CTG ATC GGA GCT TTT GGA GAC C                                | 59    | 4           |
| <i>P. icarus BRh1</i>              | LyUVRD1   | TGC AAG CAT TTC TAC ATC TAC ATT                              | 55    | 4           |
|                                    | PICAB1RD1 | GTC TCC AAA AGC TCC GGT CAT AGT                              | 59    | 3           |
|                                    | PICAB1RD2 | TGT GTC CGT TTT CGT TAG TGT GA                               | 57    | 4           |
| <i>P. icarus BRh2</i>              | AGLAB2RD1 | CCT GTA CTT GGG ATG GTT GAT G                                | 55    | 3           |
| <i>A. glandon BRh1</i>             | AGLAB1RD1 | TGG TGT TAA AAT TCC CTT GTC TCC                              | 55    | 3           |
|                                    | AGLAB1RD2 | CGT CTT CGT TAG CGG GAT TTA                                  | 55    | 4           |
| <i>A. glandon BRh2</i>             | AGLAB2RD1 | CCT GTA CTT GGG ATG GTT GAT G                                | 55    | 3           |
| <i>S. behrii BRh1</i>              | SATYBIRD1 | ATG TTC CTG TCT CCA AAT GCT C                                | 55    | 3           |
|                                    | SATYB1RD2 | TTG GTC GTT CGA GAA AAA TAC TT                               | 53    | 4           |
| <i>S. behrii BRh2</i>              | SATYB2RD1 | GCG CAG ATG AAG AGG AAG AAG ATA                              | 57    | 3           |
| <i>V. cardui BRh</i>               | VanBlueRD | CCA TGA GTA CAG AAA CAG GAA GAA                              | 56    | 3           |
| <i>A. mormo BRh</i>                | APOBRD1   | TCG CCA CAG GTG TTA AAA TAC TCC                              | 59    | 3           |
|                                    | APOBFD1   | ATC TTC TTC CTT TTT GTC TGC TCT                              | 56    | 4           |
|                                    | APOBRD2   | TCG CTC GAA AAT CCA TAG AAT AG                               | 54    | 4           |
| <i>C. philodice BlueRh</i>         | COBRD1    | AAC AGA TAA ACA GGA AGA AGA TGG                              | 53    | 3           |
| <i>B. anynana BlueRh</i>           | BANBRD1   | GCG TAM GGC GTC CAT GAG CAA ACA                              | 63    | 3           |
| <i>H. erato BlueRh</i>             | HMPBRD1   | ACA AAC AGG AAG AAG ATG GTG AAT                              | 55    | 3           |
| <i>H. melpomene BlueRh</i>         | HMPBRD1   | ACA AAC AGG AAG AAG ATG GTG AAT                              | 55    | 3           |
| <i>B. arthemis astyanax BlueRh</i> | LARASBRD1 | AAG CTC CAG TCA TAG TAA CGA ACG                              | 57    | 3           |
| <i>N. antiopa BlueRh</i>           | NANBRD1   | CAT CGT GAC AAA GGC ATA AGG TG                               | 56    | 3           |

Applications:

<sup>1</sup>cDNA synthesis adaptor primer<sup>2</sup>3'RACE (rapid amplification of cDNA ends)<sup>3</sup>5'RACE<sup>4</sup>Multiplex PCR

Table S2. *Ommatidial subtypes in the ventral eye out of 115 surveyed*

| Gene | Both R1 and R2 | Either R1 or R2 | Neither |
|------|----------------|-----------------|---------|
| UVRh | 23%            | 48%             | 29%     |
| BRh1 | 21%            | 48%             | 31%     |
| BRh2 | 0%*            | 17%             | 83%     |

\*In other sections this class of ommatidia was observed in very low numbers.

Table S3. *GenBank accession numbers of blue opsin cDNAs cloned in this study (\*) and used in the phylogenetic tree reconstruction*

| Family       | Subfamily     | Species                              | Opsin         | Accession number |
|--------------|---------------|--------------------------------------|---------------|------------------|
| Sphingidae   | Sphinginae    | <i>Manduca sexta</i>                 | <i>Manop3</i> | AD001674         |
| Pieridae     | Pierinae      | <i>Pieris rapae</i>                  | <i>PrB</i>    | AB208675         |
| Pieridae     | Pierinae      | <i>Pieris rapae</i>                  | <i>PrV</i>    | AB208674         |
| Pieridae     | Coliadae      | <i>Colias philodice</i>              | <i>BlueRh</i> | AY918899*        |
| Papilionidae | Papilioninae  | <i>Papilio xuthus</i>                | <i>PxRh4</i>  | AB028217         |
| Papilionidae | Papilioninae  | <i>Papilio glaucus</i>               | <i>PgRh6</i>  | AF077192         |
| Nymphalidae  | Danainae      | <i>Danaus plexippus</i>              | <i>Blue</i>   | AY605544         |
| Nymphalidae  | Satyrinae     | <i>Bicyclus anynana</i>              | <i>Blue</i>   | AY918894*        |
| Nymphalidae  | Heliconiinae  | <i>Heliconius erato</i>              | <i>Blue</i>   | AY918906         |
| Nymphalidae  | Heliconiinae  | <i>Heliconius melpomene</i>          | <i>Blue</i>   | AY918897*        |
| Nymphalidae  | Limenitidinae | <i>Basilarchia arthemis astyanax</i> | <i>Blue</i>   | AY918902*        |
| Nymphalidae  | Nymphalinae   | <i>Nymphalis antiopa</i>             | <i>Blue</i>   | AY918893*        |
| Nymphalidae  | Nymphalinae   | <i>Vanessa cardui</i>                | <i>BRh</i>    | AY613987*        |
| Riodnidae    | Riodininae    | <i>Apodemia mormo</i>                | <i>BRh</i>    | AY587906*        |
| Lycaenidae   | Polyommatae   | <i>Polyommatus icarus</i>            | <i>BRh1</i>   | DQ402500*        |
| Lycaenidae   | Polyommatae   | <i>Polyommatus icarus</i>            | <i>BRh2</i>   | DQ402501*        |
| Lycaenidae   | Polyommatae   | <i>Agriades glandon</i>              | <i>BRh1</i>   | DQ402502*        |
| Lycaenidae   | Polyommatae   | <i>Agriades glandon</i>              | <i>BRh2</i>   | DQ402503*        |
| Lycaenidae   | Theclinae     | <i>Satyrium behrii</i>               | <i>BRh1</i>   | DQ402498*        |
| Lycaenidae   | Theclinae     | <i>Satyrium behrii</i>               | <i>BRh2</i>   | DQ402499*        |
| Lycaenidae   | Lycaeninae    | <i>Lycaena rubidus</i>               | <i>BRh1</i>   | AY587902*        |
| Lycaenidae   | Lycaeninae    | <i>Lycaena rubidus</i>               | <i>BRh2</i>   | AY587903*        |
