# Supplementary material for: Beauty in the eye of the beholder: the two blue opsins of lycaenid butterflies and the opsin gene-driven evolution of sexually dimorphic eyes
Source: Oxford University Press journal article supplement (doi:10.1242/jeb.02360), 2006-08-03
Supplement: jeb02360fs1.pdf [file jeb02360fs1.pdf]

|                        |      |                                                    |     |
|------------------------|------|----------------------------------------------------|-----|
| <i>Vanessa cardui</i>  | LWRh | MAITSLD--PGAAALQAWGGQMAAFGSNETVVDKVLPDMLHLVDPHWYQF | 50  |
| <i>Lycaena rubidus</i> | LWRh | .S.....PA..V..M....P.AM.Y.G....I.....E...KI.A..... | 50  |
|                        |      | <b>TM1</b>                                         |     |
| <i>Vanessa cardui</i>  | LWRh | PPMNPLWHGLLGFVIGILGFISITGNGMVIYIFTTTSLKTPSNIILVVNL | 100 |
| <i>Lycaena rubidus</i> | LWRh | .....A..S..ICI..AT.....S.....L.....                | 100 |
|                        |      | <b>TM3</b>                                         |     |
| <i>Vanessa cardui</i>  | LWRh | AFSDFLMMCVMSPPMVVNCYTETWVFGPLACQLYACAGSLFGCASIWTMT | 150 |
| <i>Lycaena rubidus</i> | LWRh | .L....IITT...V...T.Y...I.....DI...C.....V.....     | 150 |
|                        |      | <b>TM4</b>                                         |     |
| <i>Vanessa cardui</i>  | LWRh | MIAFDRYNVIVKGIAAKPLTINGAMLRVLGIWVFLAWTVAPLEFGWGRYV | 200 |
| <i>Lycaena rubidus</i> | LWRh | .....L..I...L.....IT...K.A                         | 200 |
|                        |      | <b>TM5</b>                                         |     |
| <i>Vanessa cardui</i>  | LWRh | PEGNMTACGTDYLDKSWFNRSYILIIYSIFCYFSPFLIIYSYFFIVQAVA | 250 |
| <i>Lycaena rubidus</i> | LWRh | ....CV.....VH...IL..VA...A..L.....W..I...S         | 250 |
|                        |      | <b>TM6</b>                                         |     |
| <i>Vanessa cardui</i>  | LWRh | AHEKAMREQAKKMNVASLRSSDAANTSAECKLAKVALMTISLWFMWTPY  | 300 |
| <i>Lycaena rubidus</i> | LWRh | .....                                              | 300 |
|                        |      | <b>TM7</b>                                         |     |
| <i>Vanessa cardui</i>  | LWRh | LVINYAGIFETATITPLATIWGSVFAKANAVYNPIVYGISHPKYRAALYA | 350 |
| <i>Lycaena rubidus</i> | LWRh | .I..W...K.SL.S..V....I.....SI.....                 | 350 |
| <i>Vanessa cardui</i>  | LWRh | RFPALACQSPEDNASVASAATAT-EEKPSA                     | 381 |
| <i>Lycaena rubidus</i> | LWRh | ...S.....DESG...TG..VQ.....                        | 381 |

**FIG. S1**
