# Supplementary material for: Beauty in the eye of the beholder: the two blue opsins of lycaenid butterflies and the opsin gene-driven evolution of sexually dimorphic eyes
Source: Oxford University Press journal article supplement (doi:10.1242/jeb.02360), 2006-08-03
Supplement: jeb02360fs2.pdf [file jeb02360fs2.pdf]

|                        |             |             |            |            |            |             |     |
|------------------------|-------------|-------------|------------|------------|------------|-------------|-----|
| <i>V. cardui</i> BRh   | MATNYTDDIG  | PVAYPLKMT   | QEVVEHMLGW | NIPEDHQDLV | HEHWRNFFAV | SKYWHYGLAF  | 60  |
| <i>L. rubidus</i> BRh1 | .Y.F...F.   | ...H....S   | S.AE.....  | ...EY.YF.  | .....      | .....       | 60  |
| <i>S. behrii</i> BRh1  | .Y.L.E.F.   | .G....S     | S.TE.....  | ...DEY.YF. | .....      | .....       | 60  |
| <i>P. icarus</i> BRh1  | .F.L...F.   | ...-A....S  | D.AE.....  | .V..EY.YF. | .D...AY... | .W.....     | 60  |
| <i>A. glandon</i> BRh1 | .Y.L...F.   | ...-A....S  | D.AE.....  | .V..EY.YF. | .D...AY... | .W.....     | 60  |
| <i>L. rubidus</i> BRh2 | .EG.F..N..  | .L...FQ..S  | K.TE..V..  | .Y..EY.FM. | QD...SY..I | .....       | 60  |
| <i>S. behrii</i> BRh2  | .G.F..NL.   | .L...FQ..S  | K.TD..V..  | .Y..EY.FM. | Q...SY..I  | .....       | 60  |
| <i>P. icarus</i> BRh2  | .D-.S.GN..  | .M..AFQ..E  | E.TK..I..Y | .Y..EY.FM. | QD...SY..I | N.....S..L  | 60  |
| <i>A. glandon</i> BRh2 | .D-.S.EN..  | .T..AFQ..IE | E.TK.NI..Y | .Y..EY.FM. | QD...SY..I | N.....S..L  | 60  |
|                        | <b>TM1</b>  |             |            | <b>TM2</b> |            |             |     |
| <i>V. cardui</i> BRh   | IYTILMLASV  | SGNGIWIWIF  | STSKSLRSAS | NMFVINLAVF | DLMMMLEMPM | LVVNSFYQRL  | 120 |
| <i>L. rubidus</i> BRh1 | ...L.C.C.C  | L.....      | .....P.    | .....L.    | .TL..F...L | .I.....KM   | 120 |
| <i>S. behrii</i> BRh1  | .....C.C.C  | L.....      | .....P.    | .....I.    | .TL..F...L | .IA.....KM  | 120 |
| <i>P. icarus</i> BRh1  | .....FC.C.C | L.....      | .....P.    | .F.....I.  | .TL..F...L | .....TM     | 120 |
| <i>A. glandon</i> BRh1 | .....FC.C.C | L.....      | .....P.    | .F.....I.  | .TL..F...L | .....TM     | 120 |
| <i>L. rubidus</i> BRh2 | ...M.F...T. | .....       | ...A...P.  | .....      | .V.....I   | FIL...HH.I  | 120 |
| <i>S. behrii</i> BRh2  | ...M.F...I  | T.....      | .....P.    | .....      | .V...I...I | F.L...H.HI  | 120 |
| <i>P. icarus</i> BRh2  | ...M.FI...I | T.....      | ...A...P.  | .....      | .V.....I   | F.L..YHHI   | 120 |
| <i>A. glandon</i> BRh2 | ...M.FI...I | T.....      | ...A...P.  | .....      | .V.....I   | F.L..YHHI   | 120 |
|                        | <b>TM3</b>  |             |            | <b>TM4</b> |            |             |     |
| <i>V. cardui</i> BRh   | LGYQLGCDIY  | AVLGSLSGIG  | GAMTNAIIAF | DRYKTISSPL | DGRLNRVQAS | LLILFSWLWA  | 180 |
| <i>L. rubidus</i> BRh1 | ....S....   | .SF.AM....  | .....      | .....C..   | ...ITK...L | I..A...V.S  | 180 |
| <i>S. behrii</i> BRh1  | ....S....   | .SF.AM....  | .....      | .....C..   | ...ITK...L | I..A...V.S  | 180 |
| <i>P. icarus</i> BRh1  | ....S....   | .AF.AM....  | ...Q.....  | .....      | ...ITN...M | I..V.T.I.T  | 180 |
| <i>A. glandon</i> BRh1 | ....S....   | .AF.AM....  | ...Q.....  | .G.....    | ...ITN...M | I..V.T.I.T  | 180 |
| <i>L. rubidus</i> BRh2 | V...TV....  | .T...I..F.  | .I...V..Y  | .....C..   | ...VTKT..L | ....T.V..   | 180 |
| <i>S. behrii</i> BRh2  | I...AV.NV.  | .T...I..F.  | .I...V..Y  | .....C..   | ...VTKT..L | ....T.V..   | 180 |
| <i>P. icarus</i> BRh2  | I...AV.NV.  | .T...I..F.  | .I...V..Y  | .....C..   | ...VTKS..L | A...VMT.V.S | 180 |
| <i>A. glandon</i> BRh2 | V...VV.NV.  | .T...I..F.  | .I...V..Y  | .....C..   | ...VTKS..L | A...MMT.M.S | 180 |
|                        | <b>TM5</b>  |             |            |            |            |             |     |
| <i>V. cardui</i> BRh   | LPFTFLPAFR  | VWGRYVPEGF  | LTTCSFDYMT | DDQDTKIFVM | CIFVWSYVIP | MTFICCFYSK  | 240 |
| <i>L. rubidus</i> BRh1 | I.....K     | ...FI....   | .....L.    | .P...L..   | ...C...M.. | .I.L.F...S  | 240 |
| <i>S. behrii</i> BRh1  | I...L....   | ...FI....   | .....L.    | .HP...L..  | ...C...M.. | .I.L.F...S  | 240 |
| <i>P. icarus</i> BRh1  | .....F.     | ...FI....   | .....L.    | E.T...V..  | ...L...T.. | ...L.F...S  | 240 |
| <i>A. glandon</i> BRh1 | .....F.     | ...FI....   | .....L.    | E.T...V..  | ...L...AT. | .I.L.F...S  | 240 |
| <i>L. rubidus</i> BRh2 | ...I...K    | L.SKF....   | .....L.    | E.S...V..  | SCC...F..  | VIIIL.YY.FQ | 240 |
| <i>S. behrii</i> BRh2  | ...V...Q    | L.SKF....   | .....L.    | .N.....L   | SCC...F..  | I.I.L.YY.FQ | 240 |
| <i>P. icarus</i> BRh2  | ...I...IQ   | ...KF....   | .....L.    | E.YA.RM..L | VCCI.N.FL. | VFIL.YY.AL  | 240 |
| <i>A. glandon</i> BRh2 | ...I....    | ...KF....   | .....L.    | E.SA.RM..L | VCCI.D.FL. | IFIL.YY..R  | 240 |
|                        | <b>TM6</b>  |             |            |            |            |             |     |
| <i>V. cardui</i> BRh   | LFGAVRLHER  | MLKEQAKMKN  | VKSLAANKED | SGKSIEIRIA | KVAFTIFFLF | LYSWTPYAFV  | 300 |
| <i>L. rubidus</i> BRh1 | .S...M.K    | .R.....     | ...S.D.    | A..V....   | .....      | VC.....     | 300 |
| <i>S. behrii</i> BRh1  | .S...M.K    | .R.....     | ...S.D.    | A..V....   | .....      | VC.....     | 300 |
| <i>P. icarus</i> BRh1  | .N...A..    | .R.....     | ...S.DE    | A.T.V....  | .....      | VC.....     | 300 |
| <i>A. glandon</i> BRh1 | .N...A..    | .R.....     | ...S.DE    | A.T.V....  | .....      | VC.....     | 300 |
| <i>L. rubidus</i> BRh2 | .....T.K    | .R.....     | ...S..     | G..V....   | .....      | ICA.....    | 300 |
| <i>S. behrii</i> BRh2  | .....N.K    | .R.....     | ...SS..    | G..V....   | .....      | ICA.....    | 300 |
| <i>P. icarus</i> BRh2  | .....T.K    | .R.....     | ...-S.D.   | G.A.V....  | .....M.    | VCA.....    | 300 |
| <i>A. glandon</i> BRh2 | .....T.K    | .R.....     | ...-S.D.   | G.A.V....  | .....      | VCA.....    | 300 |
|                        | <b>TM7</b>  |             |            |            |            |             |     |
| <i>V. cardui</i> BRh   | TMTGAFGDRG  | LLTPVATMVP  | AVCAKIVSCI | DPWVYAINHP | RYRAELQKRL | PWMGVREADP  | 360 |
| <i>L. rubidus</i> BRh1 | .....N      | I.....      | .....      | .....      | .....E.V   | S.L..K.PN.  | 360 |
| <i>S. behrii</i> BRh1  | .....N      | M.S.....    | .....L     | .....      | .....E.V   | S.L..K.PN.  | 360 |
| <i>P. icarus</i> BRh1  | .....K      | I.....      | .A.....    | .....      | .....E.V   | S.L..K.PS.  | 360 |
| <i>A. glandon</i> BRh1 | .....K      | I.....      | .A.....    | .....      | .....E.V   | S.L..K.PS.  | 360 |
| <i>L. rubidus</i> BRh2 | .LV.....S   | I.S.....    | ...T...    | .....      | .....T...  | .L...S..    | 360 |
| <i>S. behrii</i> BRh2  | .LV.....S   | I.....I.    | ...T...    | .....      | .....T...  | ...L...Q..  | 360 |
| <i>P. icarus</i> BRh2  | .LV.....S   | I.....      | ...T...    | .....      | K.....T... | .L...K..    | 360 |
| <i>A. glandon</i> BRh2 | .LV.....S   | I.....      | ...T...    | .....      | K.....T... | .L...K..    | 360 |
| <i>V. cardui</i> BRh   | DSVSSASGAT  | AQTQNPTAEA  | *          |            |            |             | 381 |
| <i>L. rubidus</i> BRh1 | .T..TS.T..  | S.A--.-D.   | .          |            |            |             | 381 |
| <i>S. behrii</i> BRh1  | .T..TS.T..  | S....Q...   | .          |            |            |             | 381 |
| <i>P. icarus</i> BRh1  | .T..QS.T..  | S.V--.Q-    | .          |            |            |             | 381 |
| <i>A. glandon</i> BRh1 | .T..QS.T..  | S.V--.Q-    | .          |            |            |             | 381 |
| <i>L. rubidus</i> BRh2 | .TA..S.T..  | S...HH....  | .          |            |            |             | 381 |
| <i>S. behrii</i> BRh2  | .TA..S.T..  | ...HQ....   | .          |            |            |             | 381 |
| <i>P. icarus</i> BRh2  | .TA..S.T..  | S...HH....  | .          |            |            |             | 381 |
| <i>A. glandon</i> BRh2 | .TA..S.T..  | S...H....   | .          |            |            |             | 381 |

FIG S2
