# Supplementary figures and images for: Beauty in the eye of the beholder: the two blue opsins of lycaenid butterflies and the opsin gene-driven evolution of sexually dimorphic eyes
Source: Oxford University Press journal article supplement (doi:10.1242/jeb.02360), 2006-08-03

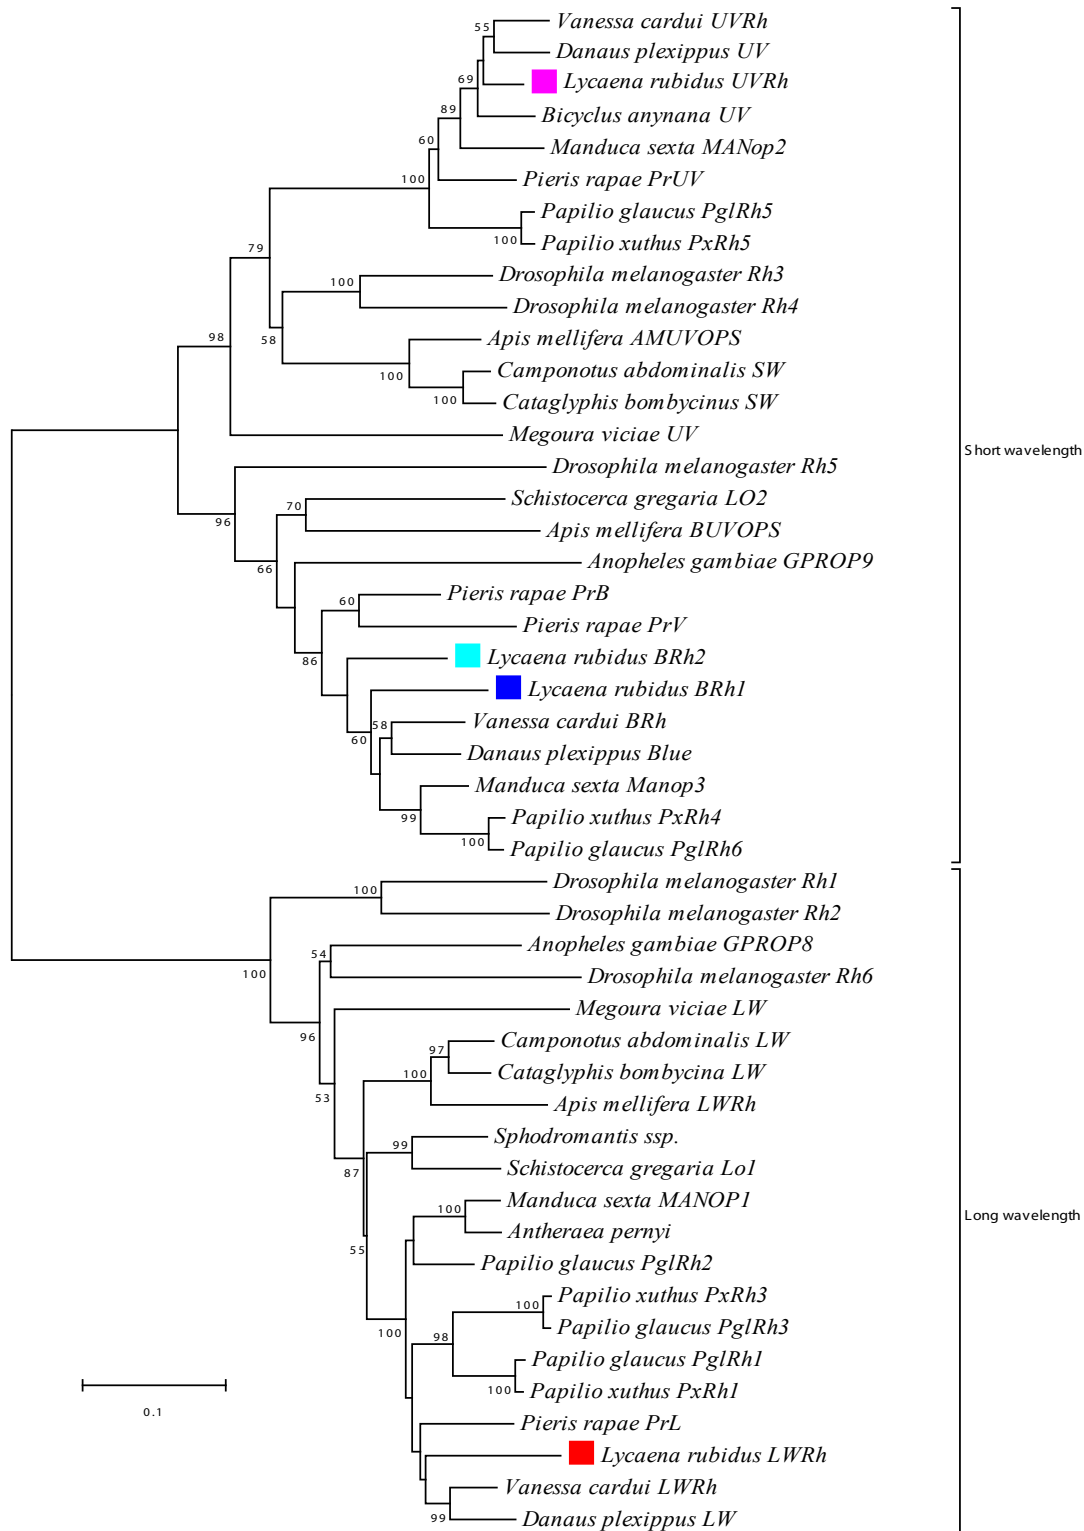

Supplementary Figure S4

Supplement: jeb02360fs4.pdf [file jeb02360fs4.pdf]
